# Supplementary material for: Calibration of Granier-Type (TDP) Sap Flow Probes by a High Precision Electronic Potometer
Source: MDPI journal article supplement (doi:10.3390/s19102419), 2019-05-27
Supplement: s1 [file s1]

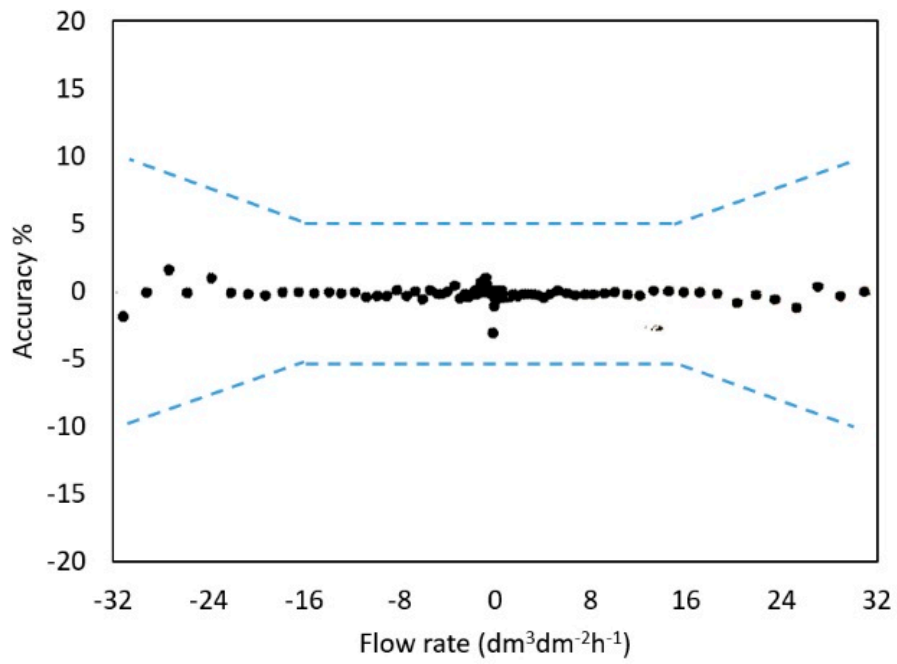

**Figure S1.** The accuracy expressed in percent is reported with the flow rate unit ( $\text{dm}^3 \text{dm}^{-2} \text{h}^{-1}$ ) for the sap flow meter Sensirion, mod. SLQ-QT500. The accuracy test on the sensor is provided by the producer of the sensor, while the figure and the scale were adapted to our case study. .
